# Supplementary material for: Application of Transthoracic Echocardiography for Cardiac Safety Evaluation in the Clinical Development Process of Vaccines Against Streptococcus pyogenes
Source: Springer Nature journal article supplement (doi:10.1007/s40268-024-00452-y), 2024-03-01
Supplement: MOESM1 [file 26871994]

**Article title:** Application of transthoracic echocardiography for cardiac safety evaluation in the clinical development process of vaccines against Group A *Streptococcus*

**Journal name:** Drug Safety

**Author names:** Usman Nakakana<sup>1</sup>, Alimamy Serry-Bangura<sup>2</sup>, Bassey Effiom Edem<sup>1</sup>, Pietro Tessitore<sup>2</sup>, Leonardo Di Cesare<sup>1</sup>, Danilo Gomes Moriel<sup>1</sup>, Audino Podda<sup>3</sup>, Iris Sarah de Ryck<sup>2</sup>, Ashwani Kumar Arora<sup>1</sup>

**Affiliations:**

<sup>1</sup>GSK Vaccines Institute for Global Health, Siena, Italy

<sup>2</sup>GSK, Siena, Italy

<sup>3</sup>Siena, Italy

**Corresponding author:**

Usman Nakakana

E-mail: [usman.n.nakakana@gsk.com](mailto:usman.n.nakakana@gsk.com)

Tel.: +393461152021

**Online Resource 1 Investigator questionnaire (Investigator’s guide for collection of signs and symptoms of pharyngitis and major manifestations of acute rheumatic fever [ARF]: rheumatic carditis and other manifestations)**

|                                                                                                                                                                                                                                                                                                                                                                                                                                                                                                                                                                                                                                                                                                                                                  |                                                                                                                                                                                            |
|--------------------------------------------------------------------------------------------------------------------------------------------------------------------------------------------------------------------------------------------------------------------------------------------------------------------------------------------------------------------------------------------------------------------------------------------------------------------------------------------------------------------------------------------------------------------------------------------------------------------------------------------------------------------------------------------------------------------------------------------------|--------------------------------------------------------------------------------------------------------------------------------------------------------------------------------------------|
| <b>Pharyngitis</b> – ask participants if they had documented pharyngitis or were treated for one since last clinic visit                                                                                                                                                                                                                                                                                                                                                                                                                                                                                                                                                                                                                         |                                                                                                                                                                                            |
| <p><b>Symptoms</b></p> <p>Throat pain / sore throat</p> <p>Difficulty swallowing</p> <p>Not eating as much</p> <p>Not drinking as much</p> <p>Croaky voice</p> <p>Feeling hot</p>                                                                                                                                                                                                                                                                                                                                                                                                                                                                                                                                                                | <p><b>Signs</b></p> <p>Fever (&gt;38°C)</p> <p>Swollen, enlarged tonsils</p> <p>Erythematous tonsils with exudate</p> <p>Enlarged, tender cervical lymph nodes</p> <p>Absence of cough</p> |
| <b>Major manifestations of ARF</b>                                                                                                                                                                                                                                                                                                                                                                                                                                                                                                                                                                                                                                                                                                               |                                                                                                                                                                                            |
| <p>A) Rheumatic carditis (mostly valvulitis)</p> <p>B) Other manifestations of ARF</p> <ul style="list-style-type: none"> <li>○ Arthritis (usually migratory polyarthritis)</li> <li>○ Sydenham chorea</li> <li>○ Erythema marginatum</li> <li>○ Subcutaneous nodules</li> </ul>                                                                                                                                                                                                                                                                                                                                                                                                                                                                 |                                                                                                                                                                                            |
| <b>Rheumatic carditis</b>                                                                                                                                                                                                                                                                                                                                                                                                                                                                                                                                                                                                                                                                                                                        |                                                                                                                                                                                            |
| <p><b>Symptoms</b></p> <ul style="list-style-type: none"> <li>○ Fatigue</li> <li>○ Weakness</li> <li>○ Shortness of breath (dyspnea) on exertion</li> <li>○ Shortness of breath when lying flat (orthopnea)</li> <li>○ Sudden awakening at night with breathlessness (paroxysmal nocturnal dyspnea)</li> <li>○ Chest pain</li> <li>○ Bilateral feet swelling</li> </ul> <p><b>Physical examination findings</b></p> <p>a) <u>Mitral regurgitation (MR): assessed by Doppler auscultation</u></p> <ul style="list-style-type: none"> <li>○ Mid/pan-systolic murmur at apex, radiating laterally (occasionally medially/ posteriorly)</li> <li>○ Apical mid-diastolic murmur (Carey Coombs)</li> <li>○ Displaced apex beat in severe MR</li> </ul> |                                                                                                                                                                                            |

b) Aortic regurgitation: assessed by Doppler auscultation

- Decrescendo early diastolic murmur at the base of the heart (aortic area) or left sternal edge, accentuated by the patient sitting forward in held expiration
- Mid-to-late diastolic murmur heard best at the cardiac apex (Austin Flint)
- Systolic murmur due to increased flow
- Wide pulse pressure

c) Heart block assessed by electrocardiography

- Prolonged P-R interval

d) Cardiac failure

- Displaced apex beat
- Pulmonary edema
- Raised jugular venous pressure
- Bilateral pedal edema
- Tachycardia
- Tachypnea

**Signs and symptoms of other manifestations of ARF**

**Arthritis**

Painful, tender joints, most commonly in the knees, ankles, elbows and wrists (migratory, asymmetrical)

**Sydenham chorea**

Jerky, uncoordinated movements, especially affecting the hands, feet, tongue and face, disappears during sleep

**Subcutaneous nodules**

Crops of small, round, painless nodules over the elbows, wrists, knees, ankles, Achilles' tendon, occiput and posterior spinal processes of the vertebrae

**Erythema marginatum**

Circular patterns of bright pink macules or papules on the trunk and proximal extremities

**Online Resource 2 Participant leaflet/questionnaire (participant's guide for reporting symptoms of rheumatic carditis and arthritis as most prevalent manifestations of acute rheumatic fever in adults)**

|                                                                                                                                                                                                                                                                       |
|-----------------------------------------------------------------------------------------------------------------------------------------------------------------------------------------------------------------------------------------------------------------------|
| <b>Symptoms of rheumatic carditis</b>                                                                                                                                                                                                                                 |
| Fatigue<br>Weakness<br>Shortness of breath (dyspnea) when you are physically active<br>Shortness of breath when lying on your back (orthopnea)<br>Sudden awakening at night with breathlessness (paroxysmal nocturnal dyspnea)<br>Chest pain<br>Swelling in both feet |
| <b>Symptoms of arthritis as a manifestation of acute rheumatic fever</b>                                                                                                                                                                                              |
| <b>Arthritis</b><br>Painful joints. This is most common in the knees, ankles, elbows and wrists. The pain can affect any joint and move from one joint to another.                                                                                                    |
